# Supplementary material for: Dry snow initialization and densification over the Greenland and Antarctic ice sheets in the ORCHIDEE land surface model
Source: Copernicus journal article supplement (doi:10.5194/egusphere-2025-5504), 2025-12-21
Supplement: Supplementary file 1 [file egusphere-2025-5504-supplement.pdf]

*Supplement of*

## **Dry snow initialization and densification over the Greenland and Antarctic ice sheets in the land surface model ORCHIDEE**

Philippe Conesa<sup>1</sup>, Cécile Agosta<sup>1</sup>, Sylvie Charbit<sup>1</sup>, Christophe Dumas<sup>1</sup>, Simon Beylat<sup>1</sup>, and Nina Raoult<sup>2</sup>

<sup>1</sup>Laboratoire des Sciences du Climat et de l'Environnement (IPSL/CEA-CNRS-UVSQ UMR8212), CEA Saclay, 91190 Gif-sur-Yvette, France

<sup>2</sup>European Centre for Medium-Range Weather Forecasts, Shinfield Park, Reading, RG2 9AX, United Kingdom

**Correspondence:** Philippe Conesa (philippe.conesa@lsce.ipsl.fr)

## 1 Snow thermal conductivity equation

Snow thermal conductivity is expressed in ORCHIDEE (Charbit et al., 2024) as follows:

$$\Lambda_{snow} = a_{\Lambda} + b_{\Lambda} \cdot \rho_{snow} \quad (S1)$$

Where  $a_{\Lambda} = 0.02 \text{ W m}^{-1} \text{ K}^{-1}$  and  $b_{\Lambda} = 2.5 \cdot 10^{-6} \text{ W m}^{-5} \text{ K}^{-1} \text{ kg}^{-2}$ .

## 5 2 Snow heat capacity equation

Snow heat capacity is expressed in ORCHIDEE as follows:

$$\text{Cap}_{snow} = a_{\text{cap}} \cdot \rho_{snow} \quad (S2)$$

Where  $a_{\text{Cap}} = 2.106 \cdot 10^3 \text{ J K}^{-1} \text{ kg}^{-1}$ .

## 3 Albedo scheme Chalita and Le Treut (1994)

$$\alpha_{snow} = a_{\text{aged}} + b_{\text{dec}} \cdot \exp\left(-\frac{\tau_{snow}}{\tau_{\text{dec}}}\right) \quad (S3)$$

Where  $a_{\text{aged}}$  represents the albedo of old snow covered surface (after aging),  $b_{\text{dec}}$  is defined in order that the sum of  $a_{\text{aged}}$  and  $b_{\text{dec}}$  represents the fresh snow albedo,  $\tau_{snow}$  is the snow age and  $\tau_{\text{dec}}$  represents the snow age decay rate in days.

The parameterized snow age,  $\tau_{snow}$  is expressed as following:

$$\tau_{snow}(t + dt) = \tau_{snow}(t) + f_{age} \quad (S4)$$

- 15 where  $t$  represent time and  $dt$  the model time step. The term,  $f_{age}$ , which represents the effect of low temperatures on metamorphism is shown:

$$f_{age} = \frac{(\tau_{snow} + (1 - \frac{\tau_{snow}}{\tau_{max}}) \cdot dt) \cdot \exp(-\frac{P_{snow}}{\delta_c}) - \tau_{snow}(t)}{1 + g_{temp}(T_{soil})} \quad (S5)$$

where  $T_{max}$  is the maximum snow age,  $P_{snow}$  is the snowfall amount during the model time step  $dt$ ,  $\delta_c$  is the critical snowfall depth required to reset the snow age.

20

$$g_{temp}(T_{soil}) = \left[ \frac{\max(T_0 - T_{soil}, 0)}{\omega_1} \right]^{\omega_2}$$

(S6)

where  $\omega_1$  and  $\omega_2$  are tuning constants.

#### 4 Albedo parameters

**Table S1.** Albedo values used for the ORCHIDEE simulations

| Parameter      | Description                                   | GrIS ASIM12L | GrIS OPT12L | AIS   |
|----------------|-----------------------------------------------|--------------|-------------|-------|
| $A_{aged}$     | Old snow albedo                               | 0.553        | 0.58        | 0.75  |
| $B_{dec}$      | Sum with $A_{aged}$ for the fresh snow albedo | 0.32         | 0.28        | 0.08  |
| $\delta_c$     | Snowfall depth required to reset snow age [m] | 0.783        | 1.0         | 1.0   |
| $\tau_{dec}$   | Snow age decay rate [d]                       | 6.911        | 2.0         | 6.9   |
| $\omega_1$     | Tuning constant                               | 3.037        | 3.0         | 3.0   |
| $\omega_2$     | Tuning constant                               | 3.974        | 6           | 6     |
| $\tau_{max}$   | Maximum snow age (d)                          | 56.183       | 54          | 54    |
| $\alpha_{ice}$ | Ice albedo                                    | 0.476        | 0.420       | 0.420 |

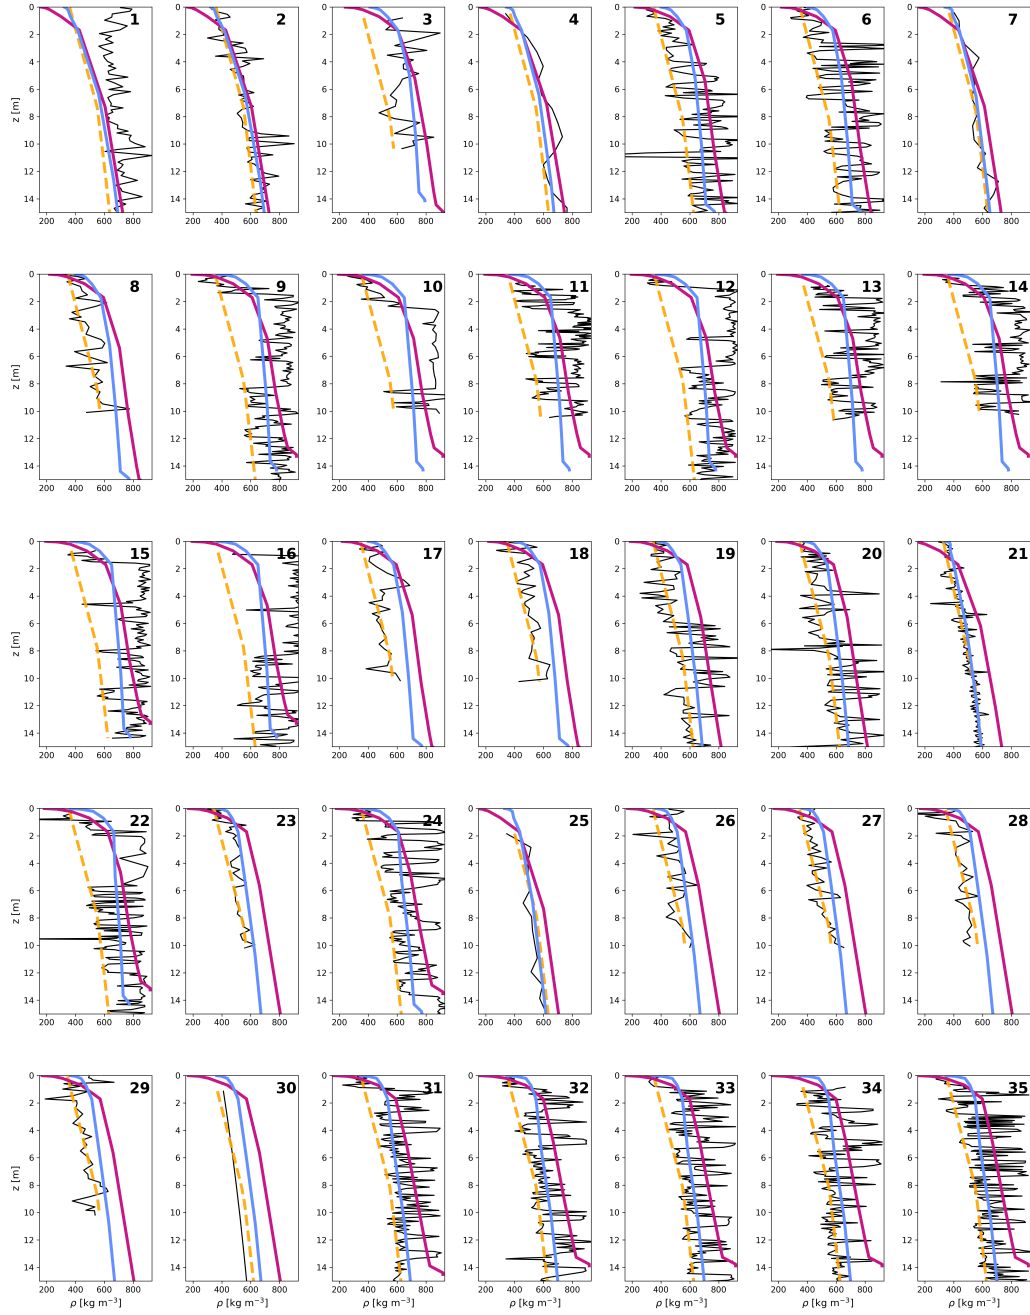

**Figure S1.** Density profiles in Greenland. Dark lines represents observed density profiles, orange dashed line the initialization profile, the purple curve the density profile before developments and calibration (OR OLD) and in blue the updated density profile (OR NEW).



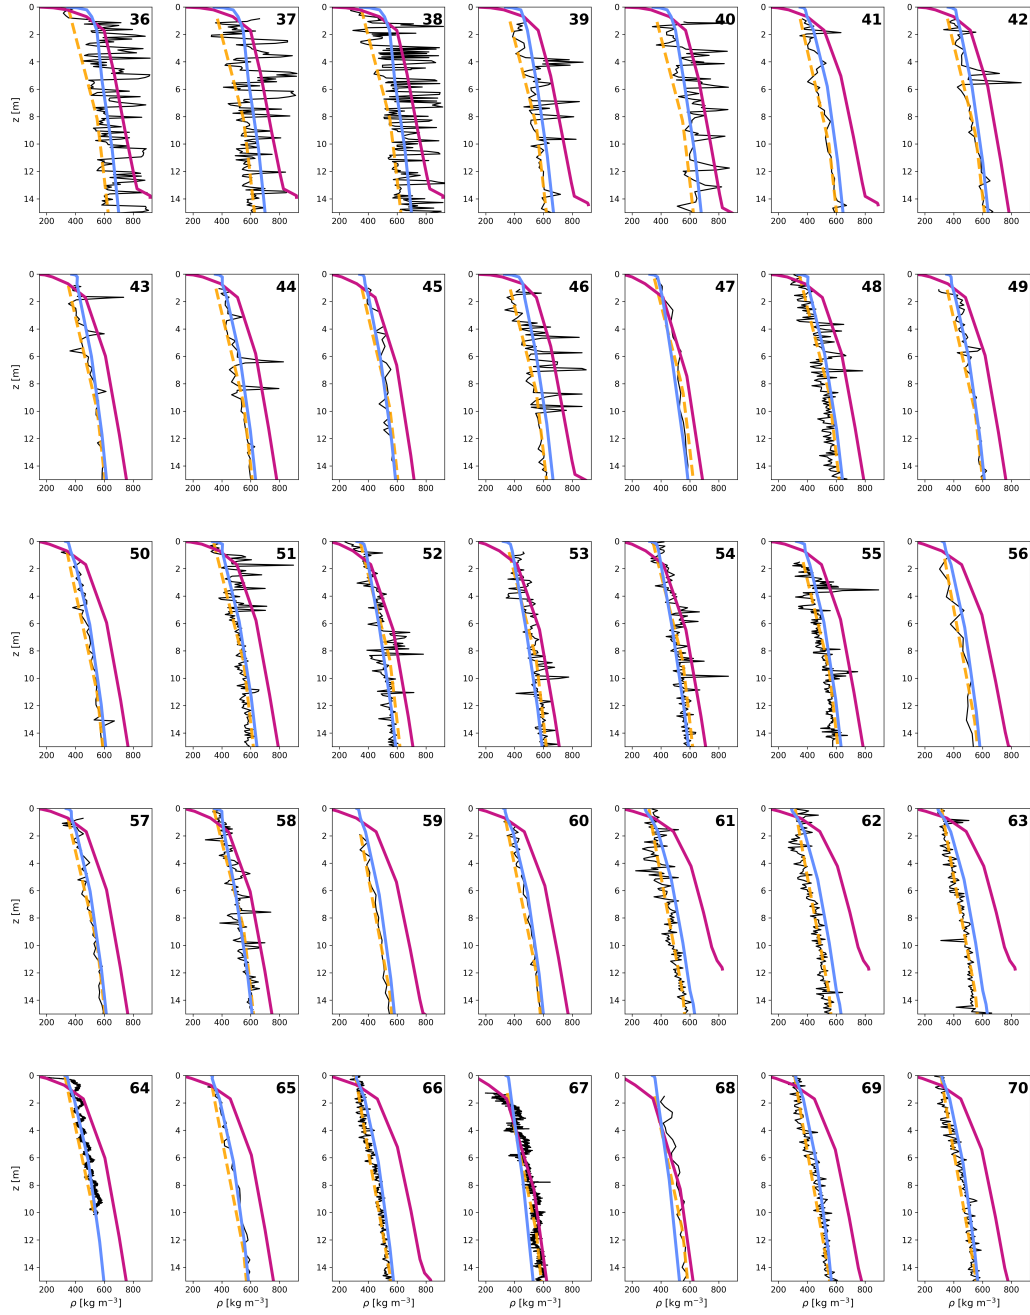

**Figure S2.** Density profiles in Greenland. Dark lines represents observed density profiles, orange dashed line the initialization profile, the purple curve the density profile before developments and calibration (OR OLD) and in blue the updated density profile (OR NEW).

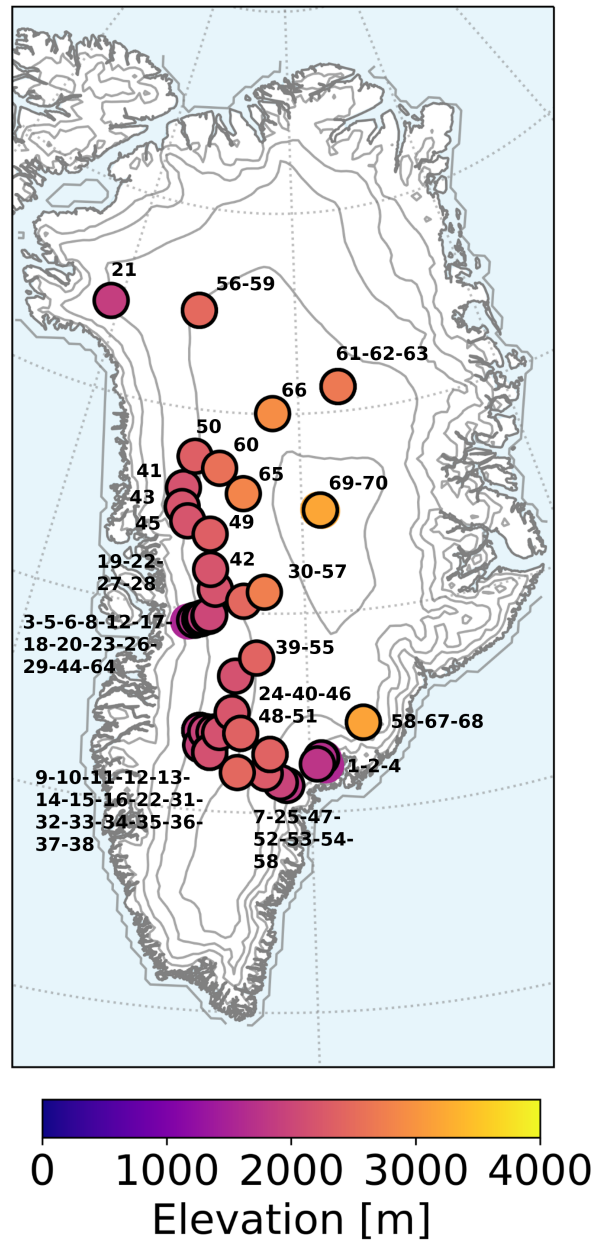

25

**Figure S3.** Locations of the numeroted density profiles in Greenland presented in Figures S1 and S2. The locations are represented as a function of their surface elevation.

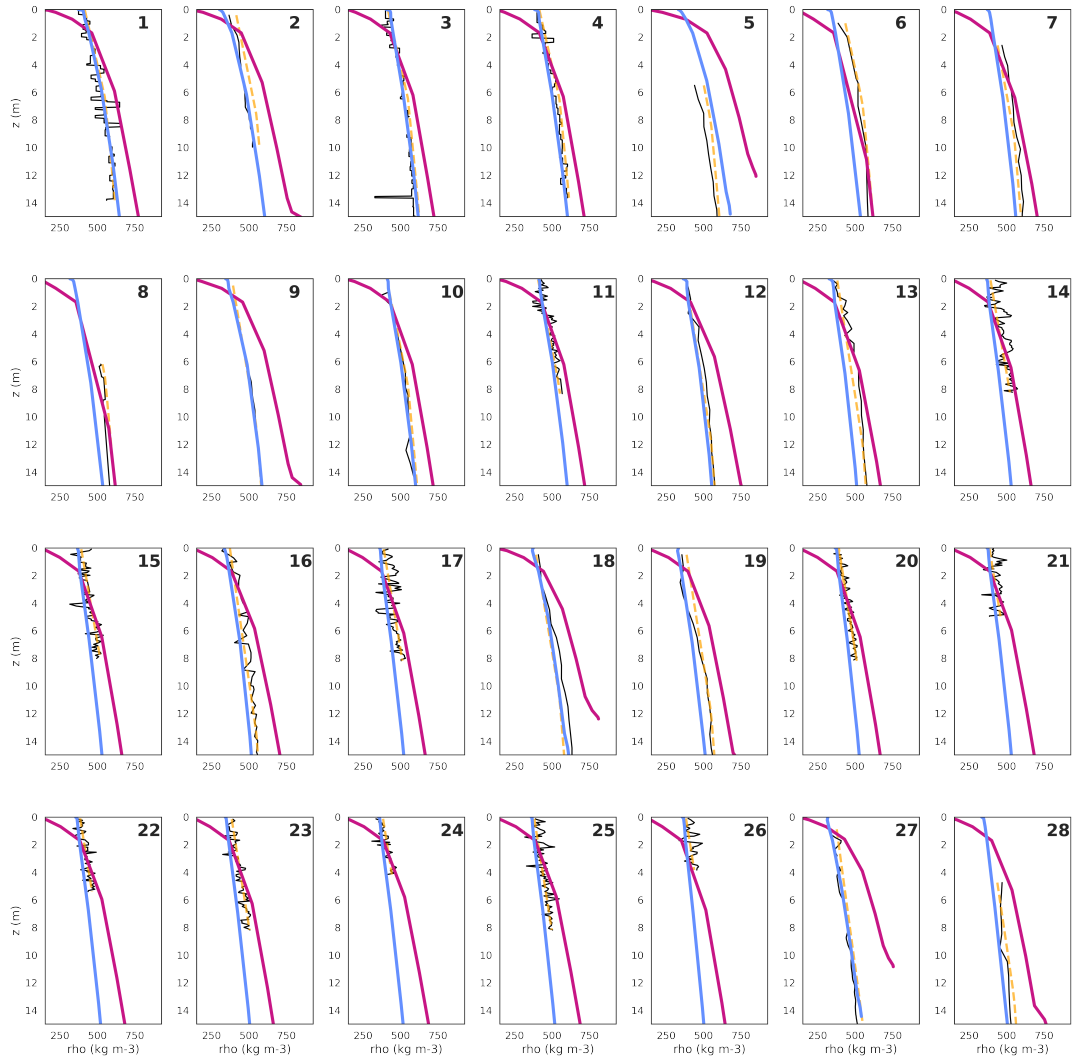

**Figure S4.** Density profiles in Antarctica. Dark lines represents observed density profiles, orange dashed line the initialization profile, the purple curve the density profile before developments and calibration (OR OLD) and in blue the updated density profile (OR NEW).

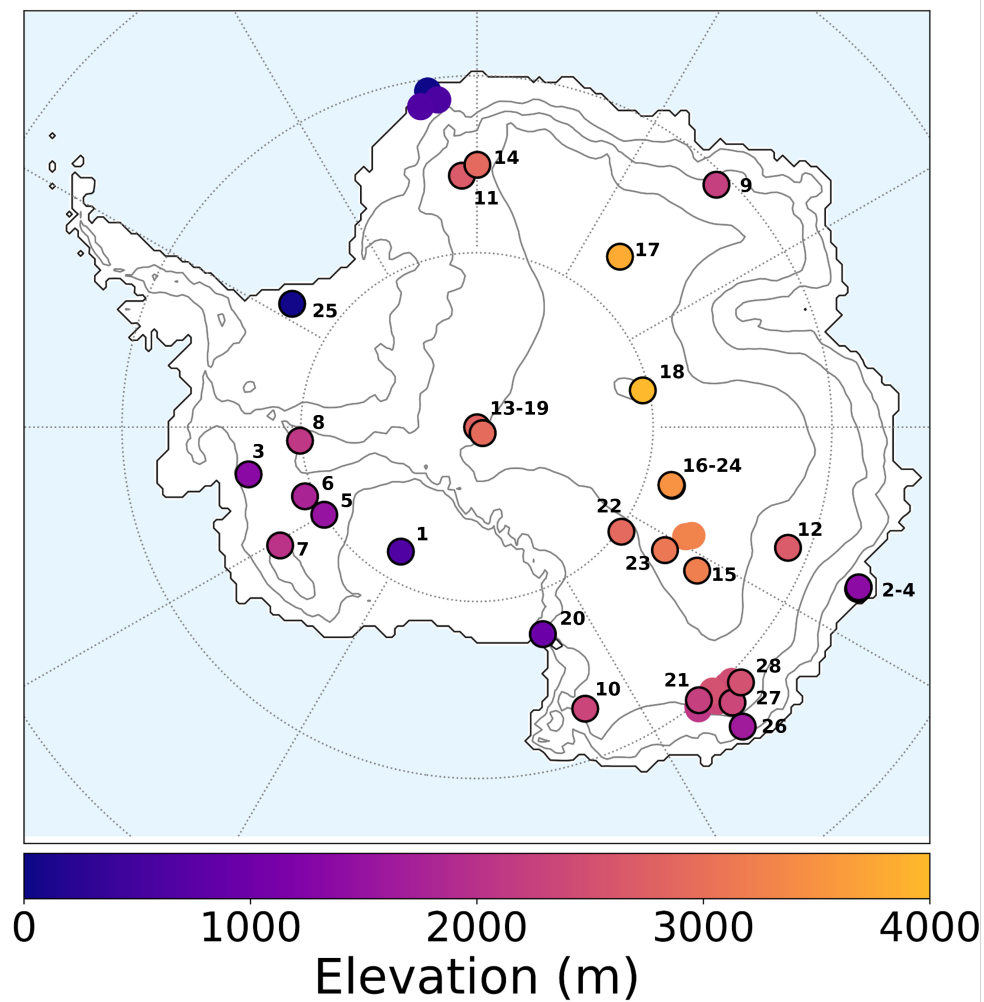

**Figure S5.** Locations of the numeroted density profiles in Antarctica presented in Figure S4. The locations are represented as a function of their surface elevation.
